# Supplementary material for: Insulin-Degrading Enzyme Is a Non Proteasomal Target of Carfilzomib and Affects the 20S Proteasome Inhibition by the Drug
Source: MDPI journal article supplement (doi:10.3390/biom12020315), 2022-02-16

**Figure S1: Testing purify of rIDE and 20S.**

rIDE (2  $\mu$ g) and purified 20S (1  $\mu$ g) were resolved by SDS-PAGE under denaturing and reducing conditions. Proteins were visualized by Coomassie Brilliant Blau (CBB). rIDE was further probed with the anti-IDE antibody used throughout this study.

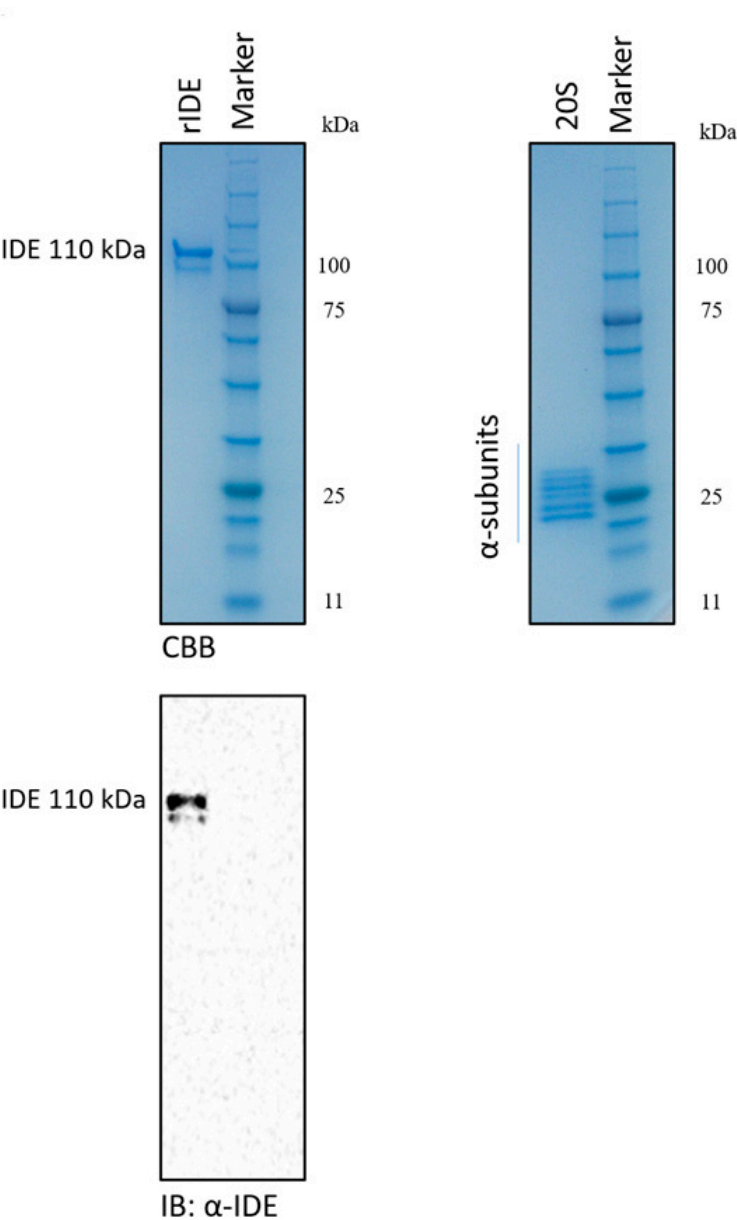

### Figure S2: Testing IDE for degradation of CFZ.

Content of CFZ in the samples containing the peptide alone (CFZ) or co-incubated with IDE (CFZ+IDE), Ins (CFZ+Ins) or Ins and IDE (CFZ+Ins+IDE) at 37°C up to 100 min. CFZ is not appreciably degraded by IDE in the presence or in the absence of Ins within the time of the experiment (up to 1.5 h)

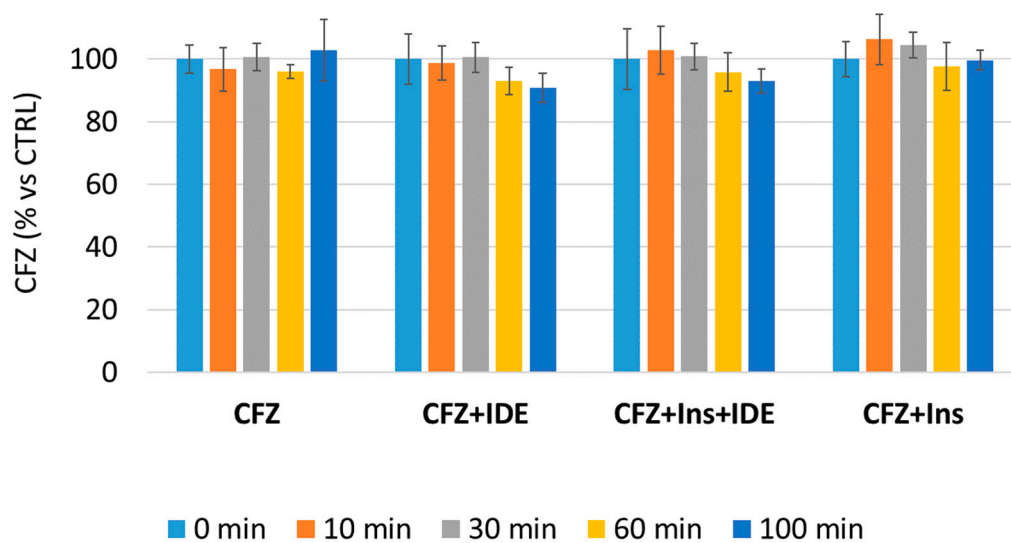

**Figure S3: Testing CFZ CC<sub>50</sub> in rMC1 cells grown in standard cultivation medium.**

rMC1 were seeded in 96-well Transwell plates. After an overnight incubation, cell monolayers were stimulated with a wide range of CFZ concentrations. After 24h of stimulation, cell viability was assayed by MTS assay. The CC<sub>50</sub> was determined by plotting the normalized O.D. calculated at each time point on the log of CFZ concentration. The experiment was run in triplicate (n=3). Data are the Mean±SD. The LogIC<sub>50</sub>±SD and the IC<sub>50</sub> are reported.

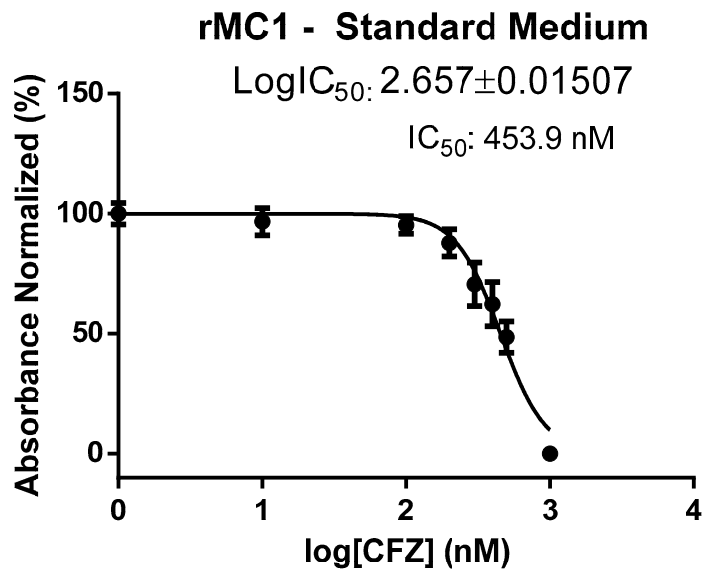

**Figure S4: Testing CFZ CC<sub>50</sub> in rMC1 cells grown in standard cultivation medium.**

(A) rMC1 were stimulated with 50 nM 75 nM and 100 nM siRNA targeting IDE or 50 nM non-targeting pool of oligonucleotides (Pool) (limitedly to the figure show). As internal control, cells were stimulated with siRNA vehicle (Ctrl). As expected, the very high dilution of Vehicle (1:2000) did not affect cell behavior (*data not shown*) and is fully comparable to untreated cells. After 72h of incubation cell lysates were immunoblotted (IB) for IDE and  $\beta$ -actin, used as internal control. Histograms report the Mean $\pm$ SD of the intensity calculated for IDE immunostaining normalized on that of actin. The experiment was run in triplicate (n=3). One-way ANOVA followed by Tukey's post-hoc significance test, \*\*\*p<0.0001;

(B) Determination of CFZ CC<sub>50</sub> of rMC1 grown in OptiMEM in the presence and absence of 50 nM IDE siRNA or non-targeting Pool. Data (Mean $\pm$ SD) were run in triplicate (n=3) and O.D. for each experimental condition plotted on the log of CFZ concentration. The LogIC<sub>50</sub> $\pm$ SD and the IC<sub>50</sub> are reported.

A

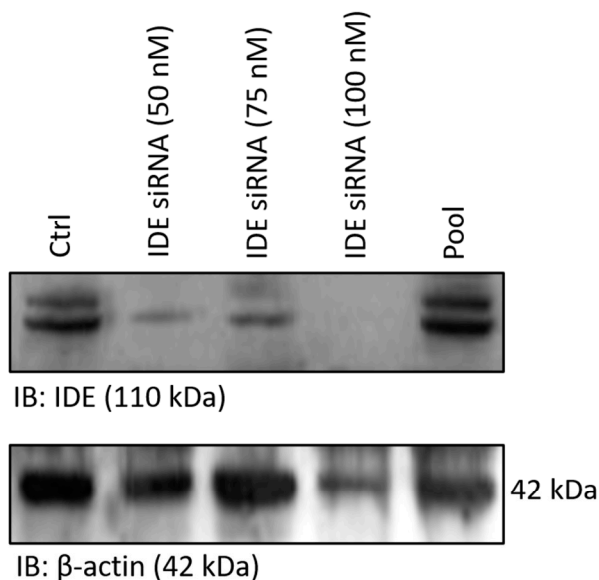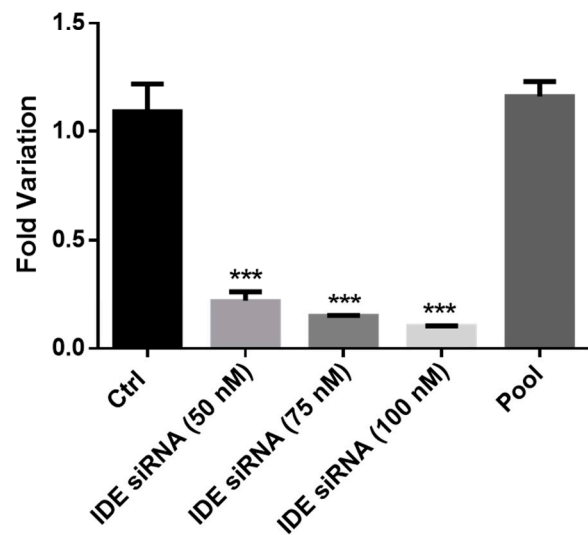

B

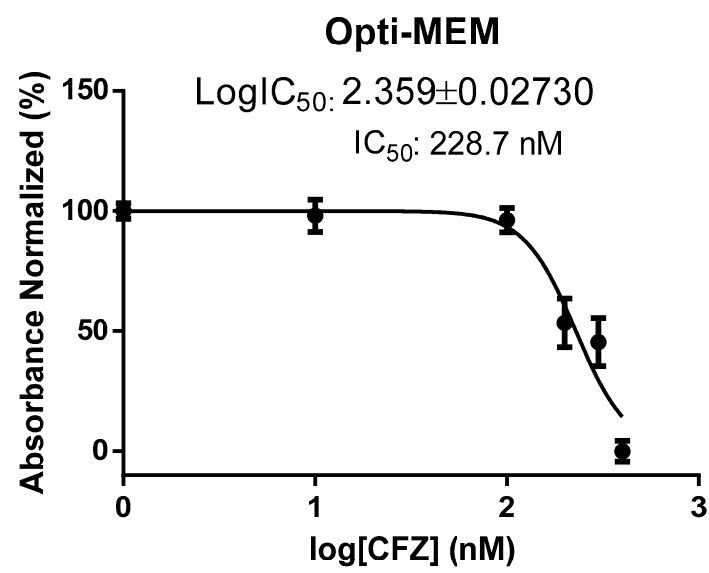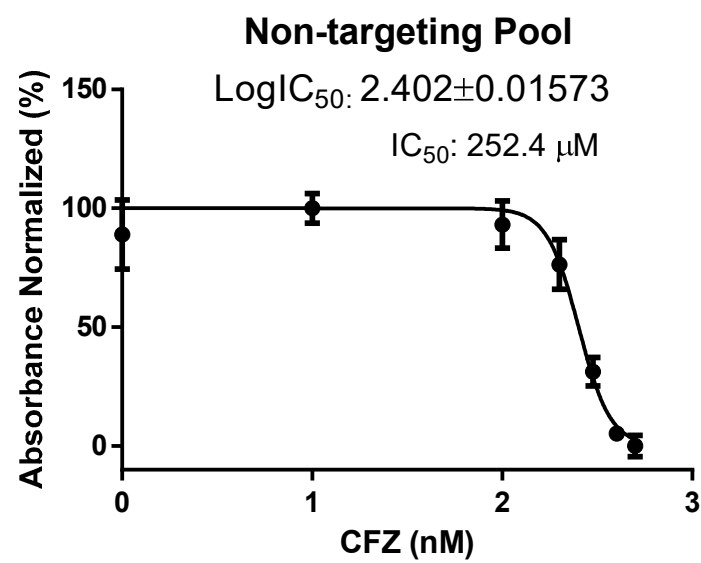

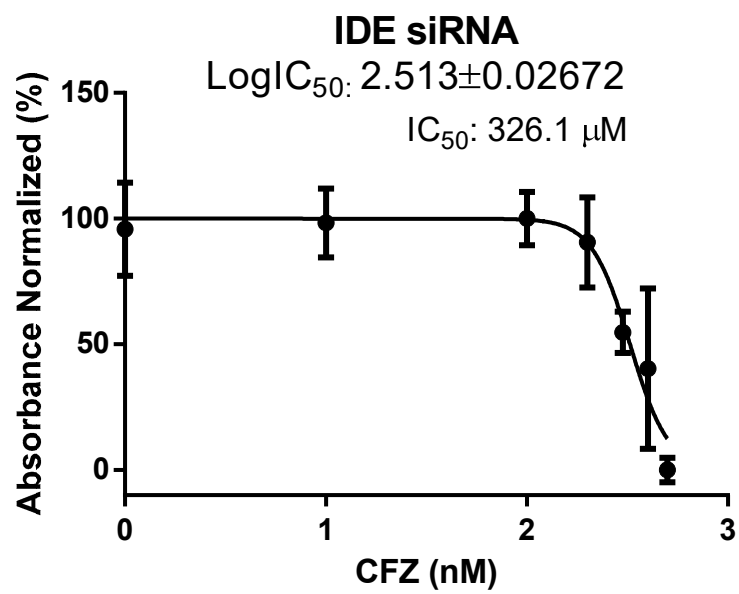

Supplement: s1 [file s1]
